# Supplementary material for: Mortality from drug-resistant tuberculosis in high-burden countries comparing routine drug susceptibility testing with whole-genome sequencing: a multicentre cohort study
Source: PubMed Central journal article supplement (PMC8896764; doi:10.1016/s2666-5247(21)00044-6), 2021-04-29
Supplement: NIHMS1720101-supplement-1.pdf [file NIHMS1720101-supplement-1.pdf]

# THE LANCET

## Microbe

### **Supplementary appendix**

This appendix formed part of the original submission and has been peer reviewed. We post it as supplied by the authors.

Supplement to: Zürcher K, Reichmuth ML, Ballif M, et al. Mortality from drug-resistant tuberculosis in high-burden countries comparing routine drug susceptibility testing with whole-genome sequencing: a multicentre cohort study. *Lancet Microbe* 2021; published online April 29. [https://doi.org/10.1016/S2666-5247\(21\)00044-6](https://doi.org/10.1016/S2666-5247(21)00044-6).

## **Supplementary materials**

Zürcher et al. Mortality from drug-resistant tuberculosis in high-burden countries comparing routine drug susceptibility testing with whole-genome sequencing: a multicentre cohort study

Lancet Microbe, 2021

**Supplementary Figure 1. Selection of the study population.**

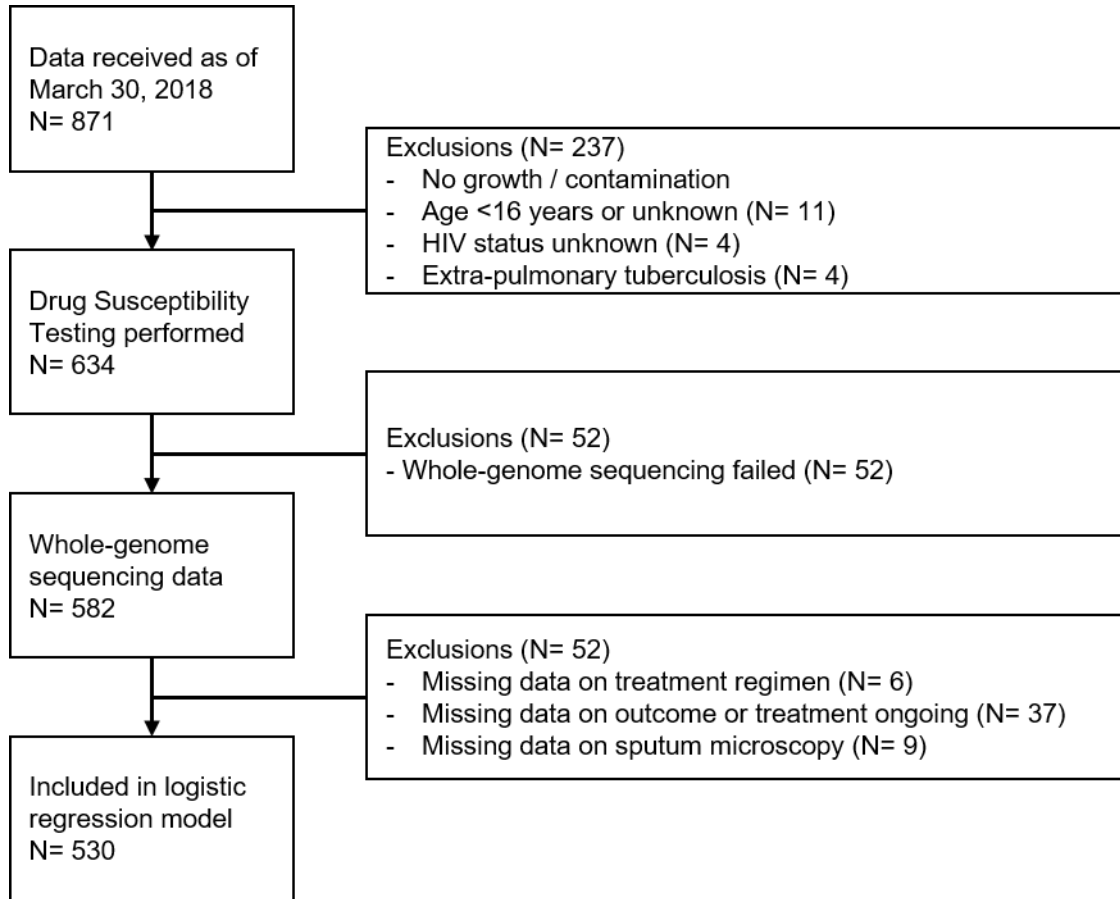

1 **Supplementary Figure 2. Results from sensitivity analysis (using > 0% variant frequency) of four logistic regression models to assess 1) the impact of any drug**  
 2 **resistance on mortality, 2) the impact of drug resistance categories on mortality, 3) the impact of diagnosis discordance on mortality, 4) the impact of treatment**  
 3 **appropriateness (according to WHO guidelines) on mortality.**  
 4

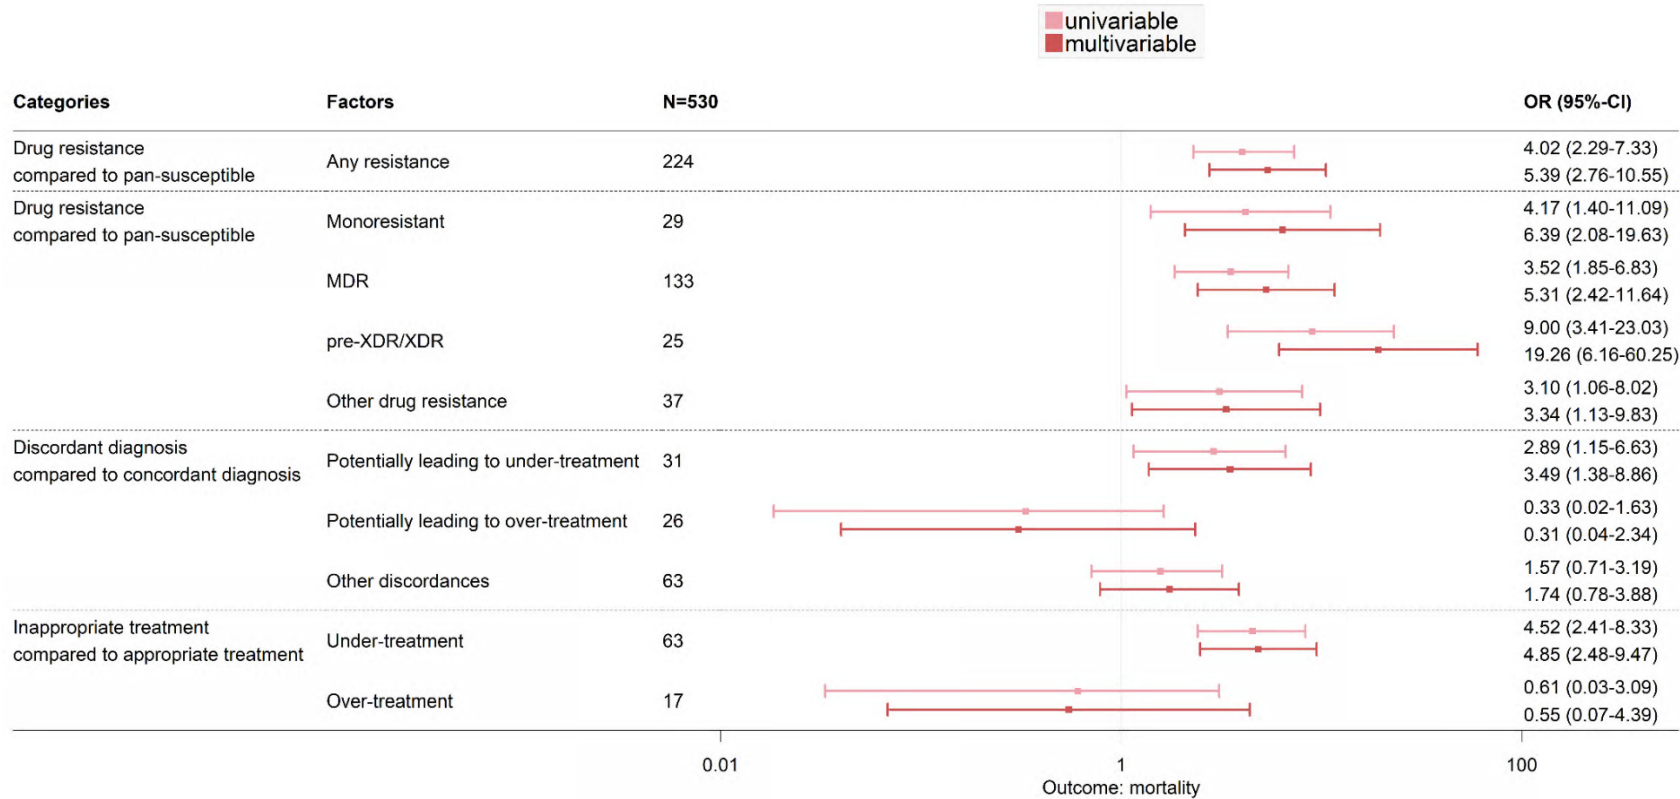

5  
 6 The models were adjusted for sex, age, HIV status, history of tuberculosis, sputum microscopy, and country of participating sites was included as random effect on the intercept.  
 7 Abbreviations: OR, odds ratio; CI, confidence interval; N, number; WHO, world health organisation; MDR, multidrug-resistant; Pre-XDR/XDR, pre-/ extensively drug resistant.

8 **Supplementary Figure 3. Results from sensitivity analysis (using 100% variant frequency) of four logistic regression to assess 1) the impact of any drug resistance**  
 9 **on mortality, 2) the impact of drug resistance categories on mortality, 3) the impact of diagnosis discordance on mortality, 4) the impact of treatment**  
 10 **appropriateness (according to WHO guidelines) on mortality.**  
 11

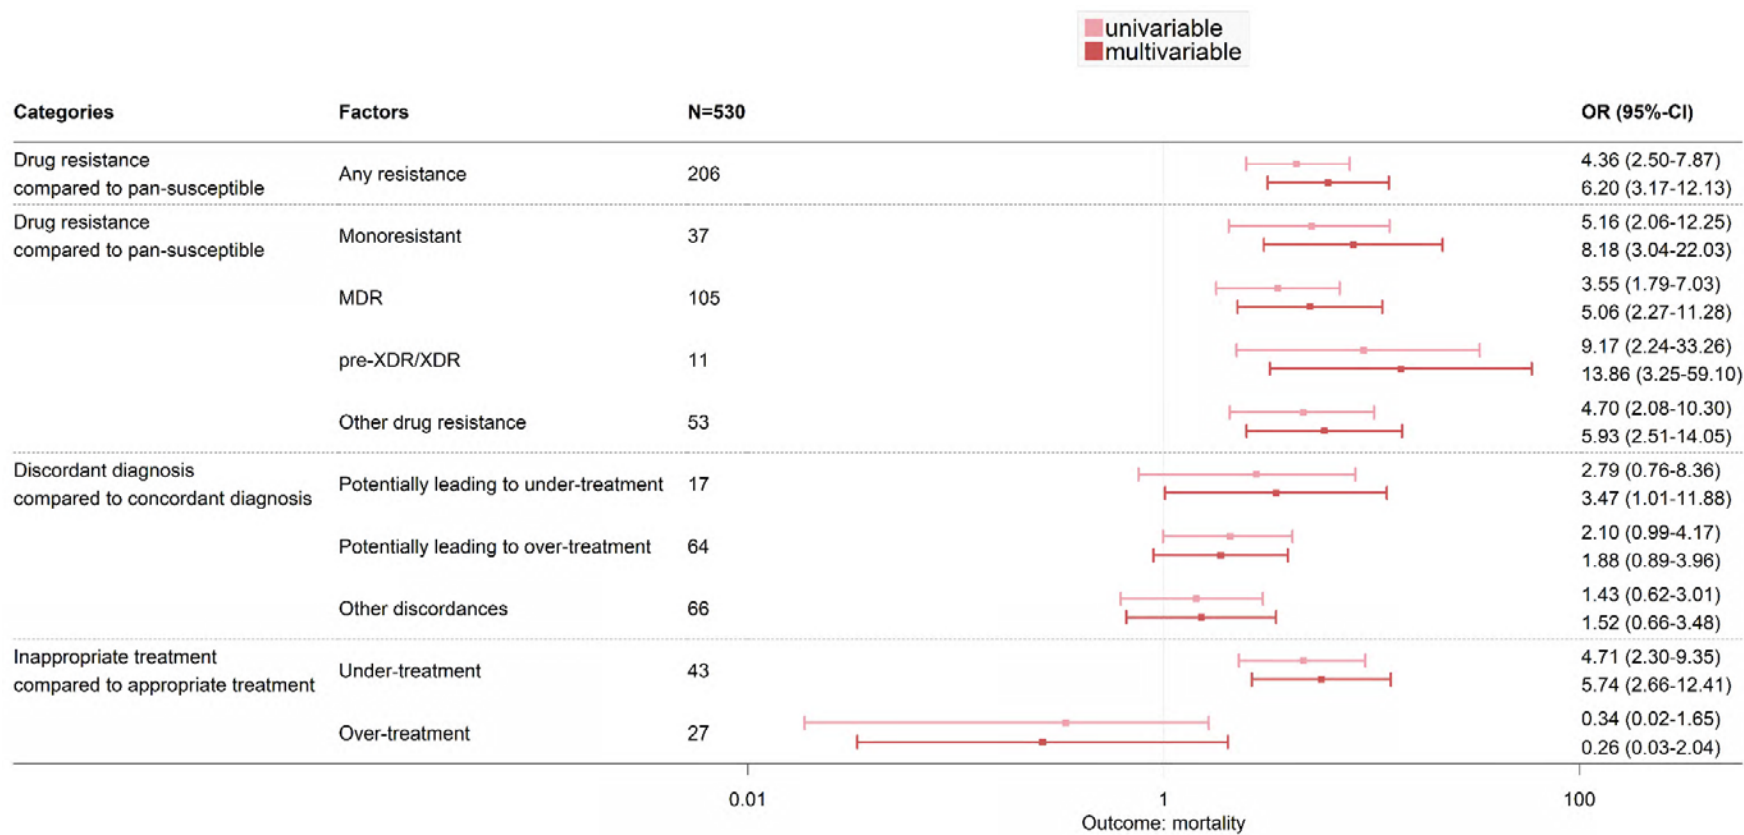

12  
 13 The models were adjusted for sex, age, HIV status, history of tuberculosis, sputum microscopy, and country of participating sites was included as random effect on the intercept.  
 14 Abbreviations: OR, odds ratio; CI, confidence interval; N, number; WHO, world health organisation; MDR, multidrug-resistant; Pre-XDR/XDR, pre-/ extensively drug resistant.

15 **Supplementary Figure 4. Results from sensitivity analysis (restricting to drug resistance for which sites could test and  $\geq 90\%$  variant frequency) of four logistic**  
 16 **regression models to assess 1) the impact of any drug resistance on mortality, 2) the impact of drug resistance categories on mortality, 3) the impact of diagnosis**  
 17 **discordance on mortality, 4) the impact of treatment appropriateness (according to WHO guidelines) on mortality.**  
 18

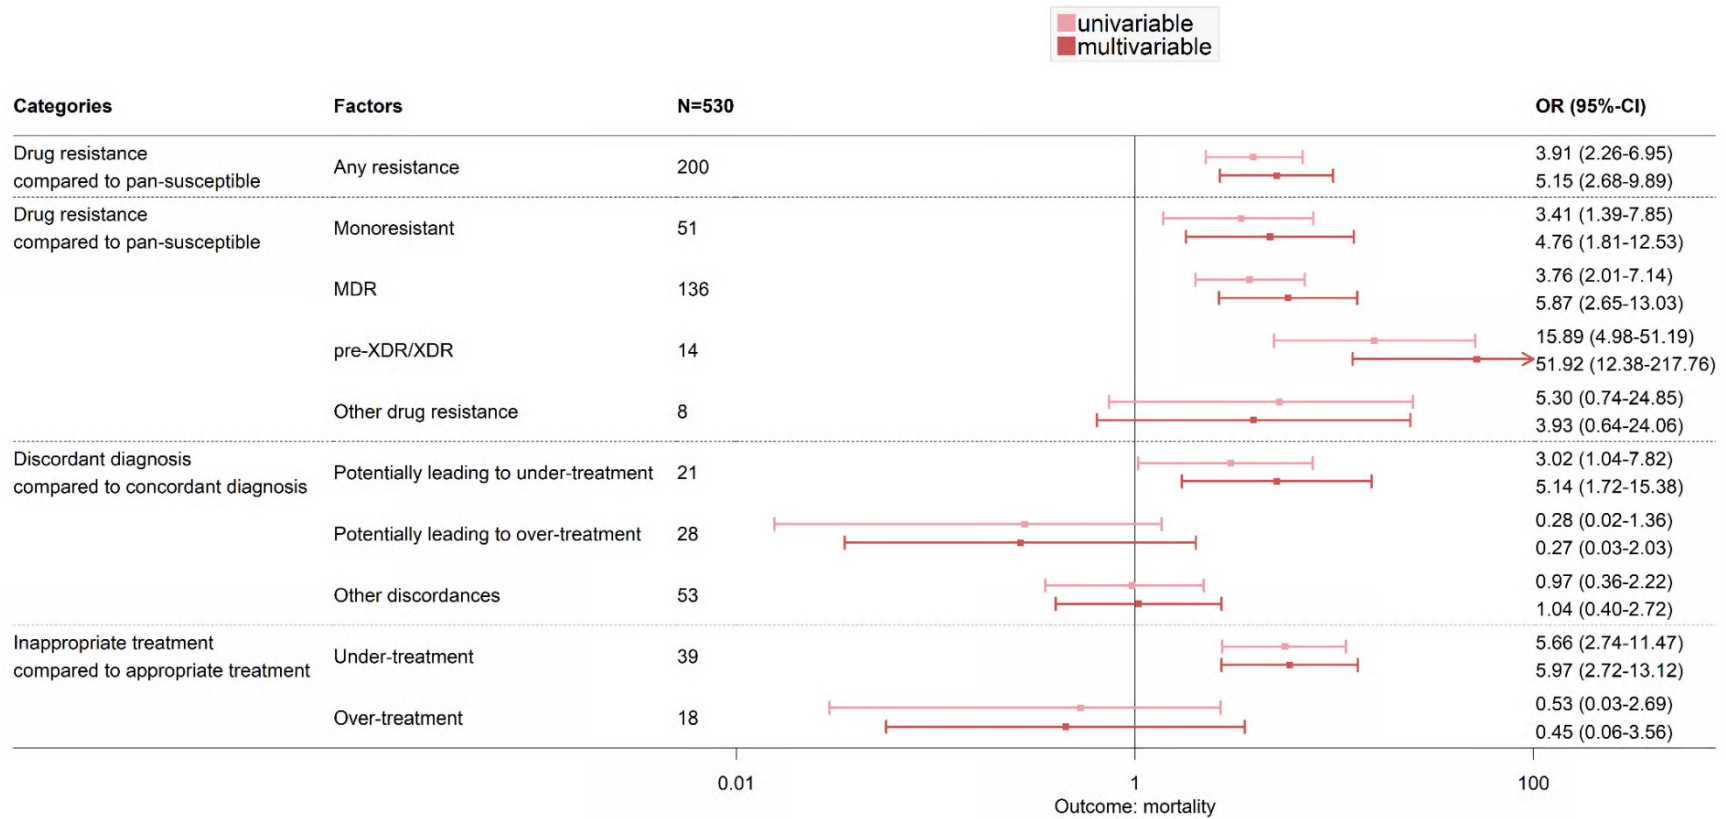

19  
 20 Footnote: The models were adjusted for sex, age, HIV status, history of tuberculosis, sputum microscopy, and country of participating sites was included as random effect on the intercept  
 21 Abbreviations: OR, odds ratio; CI, confidence interval; N, number; WHO, world health organisation; MDR, multidrug-resistant; Pre-XDR/XDR, pre-/ extensively drug resistant.

22 **Supplementary Table 1. Drug resistance category potentially leading to under- and over-treatment.**

23

| Drug resistance profile obtained with WGS | Drug resistance profile obtained at sites     | Drug resistance profile obtained at sites                     |
|-------------------------------------------|-----------------------------------------------|---------------------------------------------------------------|
|                                           | <b>Potentially leading to under-treatment</b> | <b>Potentially leading to over-treatment</b>                  |
| Pan-susceptible                           | -                                             | INH-, RIF-, or PZA- with EMB- resistance, MDR, or pre-XDR/XDR |
| Resistance to PZA or EMB                  | -                                             | INH-, RIF-, or PZA- with EMB- resistance, MDR, or pre-XDR/XDR |
| Resistance to PZA and EMB                 | Pan-susceptible, PZA-, or EMB- resistance     | INH-, RIF- resistance, MDR, or, pre-XDR/XDR                   |
| Resistance to INH                         | Pan-susceptible, PZA-, or EMB- resistance     | RIF- resistance, MDR, or pre-XDR/XDR                          |
| Resistance to RIF                         | Pan-susceptible and resistance without RIF    | pre-XDR/XDR                                                   |
| Pre-XDR/XDR                               | All resistance except pre-XDR/XDR             | -                                                             |

24

25 Abbreviations: WGS, whole-genome sequencing; INH, isoniazid; RIF, Rifampicin; PZA, pyrazinamide, EMB, ethambutol; MDR,  
 26 multidrug-resistance; Pre-XDR/XDR, pre-/extensively drug-resistance.

27

28

29

30

31 **Supplementary Table 2. Treatment appropriateness according to drug resistance profile.**  
 32

| Drug resistance                         | Number of effective drugs | Appropriate regimen | WHO guidelines                 |
|-----------------------------------------|---------------------------|---------------------|--------------------------------|
| Pan-susceptible                         | 4                         | First-line          | First-line regimen             |
| EMB- without INH- or RIF-<br>resistance | 3-4                       | First-line          | First-line regimen             |
| PZA- without INH- or RIF-<br>resistance | 3-4                       | First-line          | First-line regimen             |
| INH-resistance                          | ≥ 4                       | Second-line         | (H-INH) + RIF + PZA + EMB + FQ |
| RIF-resistance                          | ≥ 4                       | Second-line         | MDR regimen                    |
| MDR                                     | ≥ 4                       | Second-line         | MDR regimen                    |
| Pre-XDR/XDR                             | ≥ 4                       | Second-line         | MDR/XDR regimen                |

33  
 34 Abbreviations: WHO, World Health Organization; INH, isoniazid; H-INH, high-dose isoniazid; PZA, pyrazinamide; EMB, ethambutol; RIF,  
 35 rifampicin; MDR, multidrug resistance; Pre-XDR/XDR, pre-/ extensively drug resistance.



36 **Supplementary Table 3. Mutant *Mycobacterium tuberculosis* position and number of strains identified**  
 37 **locally as sensitive to a given drug, out of number of strains having the corresponding drug-resistance**  
 38 **conferring mutation based on WGS.**  
 39

| Mutations (gene)                                                                   | Drug            | No. of strains identified locally as sensitive, out of total no. of strains with the drug-resistance conferring mutation based on WGS |
|------------------------------------------------------------------------------------|-----------------|---------------------------------------------------------------------------------------------------------------------------------------|
| c.-10G>A ( <i>eis</i> )                                                            | KM              | 1/1 (100%)                                                                                                                            |
| c.-11A>C ( <i>pncA</i> )                                                           | PZA             | 1/1 (100%)                                                                                                                            |
| c.-11A>G ( <i>ethA</i> )                                                           | ETH             | 2/2 (100%)                                                                                                                            |
| c.-11C>A ( <i>embA</i> ); p.Met306Ile ( <i>embB</i> )                              | EMB             | 0/1 (0%)                                                                                                                              |
| c.-12C>T ( <i>embA</i> )                                                           | EMB             | 1/1 (100%)                                                                                                                            |
| c.-12C>T ( <i>embA</i> ); p.Asp1024Asn ( <i>embB</i> )                             | EMB             | 1/1 (100%)                                                                                                                            |
| c.-14C>T ( <i>eis</i> )                                                            | KM              | 1/1 (100%)                                                                                                                            |
| c.-15C>T ( <i>fabG1</i> )                                                          | ETH INH         | 24/40 (60%)                                                                                                                           |
| c.-15C>T ( <i>fabG1</i> ); c.65_65del ( <i>ethA</i> ); p.Ala95Thr ( <i>ethR</i> )  | ETH INH         | 1/1 (100%)                                                                                                                            |
| c.-15C>T ( <i>fabG1</i> ); c.827_827del ( <i>ethA</i> )                            | ETH INH         | 1/1 (100%)                                                                                                                            |
| c.-15C>T ( <i>fabG1</i> ); p.Ala381Pro ( <i>ethA</i> )                             | ETH INH         | 1/1 (100%)                                                                                                                            |
| c.-15C>T ( <i>fabG1</i> ); p.Ala95Thr ( <i>ethR</i> )                              | ETH INH         | 7/7 (100%)                                                                                                                            |
| c.-15C>T ( <i>fabG1</i> ); p.Ile194Thr ( <i>inhA</i> )                             | ETH INH         | 0/5 (0%)                                                                                                                              |
| c.-15C>T ( <i>fabG1</i> ); p.Ile194Thr ( <i>inhA</i> ); p.Ala95Thr ( <i>ethR</i> ) | ETH INH         | 5/5 (100%)                                                                                                                            |
| c.-15C>T ( <i>fabG1</i> ); p.Ile21Thr ( <i>inhA</i> )                              | ETH INH         | 3/6 (50%)                                                                                                                             |
| c.-15C>T ( <i>fabG1</i> ); p.Ile21Thr ( <i>inhA</i> ); p.Ala381Pro ( <i>ethA</i> ) | ETH INH         | 1/1 (100%)                                                                                                                            |
| c.-15C>T ( <i>fabG1</i> ); p.Ile21Val ( <i>inhA</i> )                              | ETH INH         | 1/1 (100%)                                                                                                                            |
| c.-15C>T ( <i>fabG1</i> ); p.Ser315Gly ( <i>katG</i> )                             | ETH INH         | 1/1 (100%)                                                                                                                            |
| c.-15C>T ( <i>fabG1</i> ); p.Ser315Thr ( <i>katG</i> )                             | INH ETH         | 1/7 (14%)                                                                                                                             |
| c.-16C>G ( <i>embA</i> )                                                           | EMB             | 1/1 (100%)                                                                                                                            |
| c.-16C>T ( <i>embA</i> )                                                           | EMB             | 1/1 (100%)                                                                                                                            |
| c.-16C>T ( <i>embA</i> ); p.Met306Ile ( <i>embB</i> )                              | EMB             | 1/1 (100%)                                                                                                                            |
| c.-16C>T ( <i>embA</i> ); p.Met306Val ( <i>embB</i> )                              | EMB             | 1/1 (100%)                                                                                                                            |
| c.-16C>T ( <i>thyX</i> )                                                           | PAS             | 1/1 (100%)                                                                                                                            |
| c.-17G>T ( <i>fabG1</i> )                                                          | ETH INH         | 2/3 (67%)                                                                                                                             |
| c.-17G>T ( <i>fabG1</i> ); p.Ala381Pro ( <i>ethA</i> )                             | ETH INH         | 7/7 (100%)                                                                                                                            |
| c.-17G>T ( <i>fabG1</i> ); p.Ser315Thr ( <i>katG</i> )                             | INH ETH         | 1/8 (12%)                                                                                                                             |
| c.-48G>A ( <i>ahpC</i> )                                                           | INH             | 0/1 (0%)                                                                                                                              |
| c.-54C>T ( <i>ahpC</i> )                                                           | INH             | 1/1 (100%)                                                                                                                            |
| c.-74G>A ( <i>ahpC</i> )                                                           | INH             | 1/1 (100%)                                                                                                                            |
| c.-8T>A ( <i>fabG1</i> ); p.Ser315Thr ( <i>katG</i> )                              | INH             | 4/7 (57%)                                                                                                                             |
| c.-8T>C ( <i>fabG1</i> )                                                           | ETH INH         | 14/14 (100%)                                                                                                                          |
| c.-8T>C ( <i>fabG1</i> ); p.Ser315Thr ( <i>katG</i> )                              | INH ETH         | 8/14 (57%)                                                                                                                            |
| c.102_102del ( <i>gid</i> )                                                        | SM              | 5/7 (71%)                                                                                                                             |
| c.1054_1054del ( <i>ethA</i> )                                                     | ETH             | 1/1 (100%)                                                                                                                            |
| c.115_115del ( <i>gid</i> )                                                        | SM              | 6/7 (86%)                                                                                                                             |
| c.1247_1248insT ( <i>katG</i> ); c.-81C>T ( <i>ahpC</i> )                          | INH             | 0/1 (0%)                                                                                                                              |
| c.1282_1290del ( <i>rpoB</i> )                                                     | RIF             | 1/1 (100%)                                                                                                                            |
| c.1292_1293del ( <i>ethA</i> )                                                     | ETH             | 1/1 (100%)                                                                                                                            |
| c.139_139del ( <i>pncA</i> )                                                       | PZA             | 1/1 (100%)                                                                                                                            |
| c.140_140del ( <i>ethA</i> )                                                       | ETH             | 2/2 (100%)                                                                                                                            |
| c.171_172insAC ( <i>pncA</i> )                                                     | PZA             | 1/1 (100%)                                                                                                                            |
| c.210_210del ( <i>ethA</i> )                                                       | ETH             | 1/1 (100%)                                                                                                                            |
| c.341_341del ( <i>ethA</i> )                                                       | ETH             | 2/2 (100%)                                                                                                                            |
| c.351_351del ( <i>gid</i> )                                                        | SM              | 2/2 (100%)                                                                                                                            |
| c.389_389del ( <i>pncA</i> )                                                       | PZA             | 2/2 (100%)                                                                                                                            |
| c.391_392insG ( <i>pncA</i> )                                                      | PZA             | 1/1 (100%)                                                                                                                            |
| c.407_408insA ( <i>pncA</i> )                                                      | PZA             | 1/1 (100%)                                                                                                                            |
| c.433_434insGC ( <i>ald</i> )                                                      | CS              | 1/1 (100%)                                                                                                                            |
| c.459_466del ( <i>pncA</i> )                                                       | PZA             | 1/1 (100%)                                                                                                                            |
| c.517_518insG ( <i>pncA</i> )                                                      | PZA             | 7/7 (100%)                                                                                                                            |
| c.597_597del ( <i>ethA</i> )                                                       | ETH             | 1/1 (100%)                                                                                                                            |
| c.626_627del ( <i>ethA</i> )                                                       | ETH             | 2/2 (100%)                                                                                                                            |
| c.639_640del ( <i>ethA</i> )                                                       | ETH             | 3/3 (100%)                                                                                                                            |
| Chromosome:g.2288682_2289080del ( <i>pncA</i> )                                    | PZA             | 1/1 (100%)                                                                                                                            |
| Chromosome:g.4407912_4408042del ( <i>gid</i> )                                     | SM              | 2/2 (100%)                                                                                                                            |
| p.Ala146Glu ( <i>pncA</i> )                                                        | PZA             | 1/1 (100%)                                                                                                                            |
| p.Ala146Thr ( <i>pncA</i> )                                                        | PZA             | 4/4 (100%)                                                                                                                            |
| p.Ala28Asp ( <i>pncA</i> )                                                         | PZA             | 1/1 (100%)                                                                                                                            |
| p.Ala381Pro ( <i>ethA</i> )                                                        | ETH             | 1/1 (100%)                                                                                                                            |
| p.Ala90Val ( <i>gyrA</i> )                                                         | CIP LFX MFX OFX | 6/6 (100%)                                                                                                                            |
| p.Ala95Thr ( <i>ethR</i> )                                                         | ETH             | 2/2 (100%)                                                                                                                            |
| p.Asn138His ( <i>katG</i> )                                                        | INH             | 0/1 (0%)                                                                                                                              |
| p.Asp12Ala ( <i>pncA</i> )                                                         | PZA             | 3/4 (75%)                                                                                                                             |
| p.Asp136Gly ( <i>pncA</i> )                                                        | PZA             | 1/1 (100%)                                                                                                                            |

|                                                           |                 |             |
|-----------------------------------------------------------|-----------------|-------------|
| p.Asp354Ala ( <i>embB</i> )                               | EMB             | 1/1 (100%)  |
| p.Asp435Phe ( <i>rpoB</i> )                               | RIF             | 0/3 (0%)    |
| p.Asp435Tyr ( <i>rpoB</i> )                               | RIF             | 0/2 (0%)    |
| p.Asp435Tyr ( <i>rpoB</i> ); p.Pro454His ( <i>rpoB</i> )  | RIF             | 0/1 (0%)    |
| p.Asp435Val ( <i>rpoB</i> )                               | RIF             | 0/42 (0%)   |
| p.Asp494Ala ( <i>gyrB</i> )                               | CIP LFX MFX OFX | 1/1 (100%)  |
| p.Asp8Ala ( <i>pncA</i> )                                 | PZA             | 1/1 (100%)  |
| p.Asp8Asn ( <i>pncA</i> )                                 | PZA             | 2/2 (100%)  |
| p.Asp8Gly ( <i>pncA</i> )                                 | PZA             | 1/1 (100%)  |
| p.Asp94Ala ( <i>gyrA</i> )                                | CIP LFX MFX OFX | 4/5 (80%)   |
| p.Asp94Gly ( <i>gyrA</i> )                                | CIP LFX MFX OFX | 8/12 (67%)  |
| p.Cys14Arg ( <i>pncA</i> )                                | PZA             | 2/2 (100%)  |
| p.Cys14Gly ( <i>pncA</i> )                                | PZA             | 1/1 (100%)  |
| p.Cys14Trp ( <i>pncA</i> )                                | PZA             | 1/1 (100%)  |
| p.Cys72Arg ( <i>pncA</i> )                                | PZA             | 1/1 (100%)  |
| p.Gln10Arg ( <i>pncA</i> )                                | PZA             | 5/5 (100%)  |
| p.Gln165Pro ( <i>ethA</i> )                               | ETH             | 3/3 (100%)  |
| p.Gln429His ( <i>rpoB</i> ); p.Asp435Phe ( <i>rpoB</i> )  | RIF             | 0/1 (0%)    |
| p.Gln429His ( <i>rpoB</i> ); p.Asp435Tyr ( <i>rpoB</i> )  | RIF             | 0/2 (0%)    |
| p.Gln432Leu ( <i>rpoB</i> )                               | RIF             | 0/1 (0%)    |
| p.Gln432Lys ( <i>rpoB</i> )                               | RIF             | 0/1 (0%)    |
| p.Gln497Arg ( <i>embB</i> )                               | EMB             | 7/8 (88%)   |
| p.Gln497Lys ( <i>embB</i> )                               | EMB             | 2/2 (100%)  |
| p.Gln497Lys ( <i>embB</i> ); p.Asp1024Asn ( <i>embB</i> ) | EMB             | 1/1 (100%)  |
| p.Glu405Asp ( <i>embB</i> )                               | EMB             | 1/1 (100%)  |
| p.Gly234Glu ( <i>katG</i> ); c.-74G>A ( <i>ahpC</i> )     | INH             | 0/1 (0%)    |
| p.Gly240Arg ( <i>embR</i> )                               | EMB             | 1/1 (100%)  |
| p.Gly297Val ( <i>katG</i> )                               | INH             | 1/1 (100%)  |
| p.Gly406Ala ( <i>embB</i> )                               | EMB             | 2/2 (100%)  |
| p.Gly406Asp ( <i>embB</i> )                               | EMB             | 3/3 (100%)  |
| p.Gly406Asp ( <i>embB</i> ); p.Asp1024Asn ( <i>embB</i> ) | EMB             | 1/1 (100%)  |
| p.Gly406Cys ( <i>embB</i> )                               | EMB             | 1/1 (100%)  |
| p.Gly406Ser ( <i>embB</i> )                               | EMB             | 2/2 (100%)  |
| p.Gly406Ser ( <i>embB</i> ); p.His1002Arg ( <i>embB</i> ) | EMB             | 1/1 (100%)  |
| p.Gly78Asp ( <i>pncA</i> )                                | PZA             | 1/1 (100%)  |
| p.Gly97Cys ( <i>pncA</i> )                                | PZA             | 1/1 (100%)  |
| p.His1002Arg ( <i>embB</i> )                              | EMB             | 1/1 (100%)  |
| p.His445Asn ( <i>rpoB</i> )                               | RIF             | 0/1 (0%)    |
| p.His445Asp ( <i>rpoB</i> )                               | RIF             | 0/16 (0%)   |
| p.His445Gln ( <i>rpoB</i> )                               | RIF             | 0/1 (0%)    |
| p.His445Leu ( <i>rpoB</i> )                               | RIF             | 1/7 (14%)   |
| p.His445Ser ( <i>rpoB</i> )                               | RIF             | 0/2 (0%)    |
| p.His445Ser ( <i>rpoB</i> ); p.Lys446Gln ( <i>rpoB</i> )  | RIF             | 0/2 (0%)    |
| p.His445Thr ( <i>rpoB</i> ); p.Lys446Gln ( <i>rpoB</i> )  | RIF             | 0/1 (0%)    |
| p.His445Tyr ( <i>rpoB</i> )                               | RIF             | 0/9 (0%)    |
| p.His51Arg ( <i>pncA</i> )                                | PZA             | 8/8 (100%)  |
| p.His57Tyr ( <i>pncA</i> )                                | PZA             | 2/2 (100%)  |
| p.His71Arg ( <i>pncA</i> )                                | PZA             | 1/1 (100%)  |
| p.His82Arg ( <i>pncA</i> )                                | PZA             | 1/1 (100%)  |
| p.Ile43Thr ( <i>folC</i> )                                | PAS             | 1/1 (100%)  |
| p.Ile491Phe ( <i>rpoB</i> )                               | RIF             | 0/1 (0%)    |
| p.Ile5Ser ( <i>pncA</i> )                                 | PZA             | 1/1 (100%)  |
| p.Ile90Ser ( <i>pncA</i> )                                | PZA             | 1/1 (100%)  |
| p.Leu113Arg ( <i>alr</i> )                                | CS              | 3/3 (100%)  |
| p.Leu120Pro ( <i>pncA</i> )                               | PZA             | 2/2 (100%)  |
| p.Leu159Arg ( <i>pncA</i> )                               | PZA             | 1/1 (100%)  |
| p.Leu172Pro ( <i>pncA</i> )                               | PZA             | 1/1 (100%)  |
| p.Leu272Pro ( <i>ethA</i> )                               | ETH             | 1/1 (100%)  |
| p.Leu27Pro ( <i>pncA</i> )                                | PZA             | 1/1 (100%)  |
| p.Leu430Pro ( <i>rpoB</i> )                               | RIF             | 0/7 (0%)    |
| p.Leu430Pro ( <i>rpoB</i> ); p.Asp435Gly ( <i>rpoB</i> )  | RIF             | 0/1 (0%)    |
| p.Leu430Pro ( <i>rpoB</i> ); p.Ser431Thr ( <i>rpoB</i> )  | RIF             | 0/1 (0%)    |
| p.Leu452Pro ( <i>rpoB</i> )                               | RIF             | 0/6 (0%)    |
| p.Leu4Ser ( <i>pncA</i> )                                 | PZA             | 1/1 (100%)  |
| p.Lys43Arg ( <i>rpsL</i> )                                | SM              | 22/35 (63%) |
| p.Lys48Thr ( <i>pncA</i> )                                | PZA             | 2/2 (100%)  |
| p.Lys88Arg ( <i>rpsL</i> )                                | SM              | 3/6 (50%)   |
| p.Lys88Gln ( <i>rpsL</i> )                                | SM              | 1/1 (100%)  |
| p.Lys88Thr ( <i>rpsL</i> )                                | SM              | 1/1 (100%)  |
| p.Met1000Arg ( <i>embB</i> )                              | EMB             | 1/1 (100%)  |
| p.Met306Ile ( <i>embB</i> )                               | EMB             | 28/34 (82%) |
| p.Met306Ile ( <i>embB</i> ); p.Asp328Gly ( <i>embB</i> )  | EMB             | 1/1 (100%)  |
| p.Met306Ile ( <i>embB</i> ); p.Asp354Ala ( <i>embB</i> )  | EMB             | 0/1 (0%)    |
| p.Met306Ile ( <i>embB</i> ); p.Gly406Ala ( <i>embB</i> )  | EMB             | 1/1 (100%)  |
| p.Met306Leu ( <i>embB</i> )                               | EMB             | 2/2 (100%)  |

|                                                          |                 |              |
|----------------------------------------------------------|-----------------|--------------|
| p.Met306Val ( <i>embB</i> )                              | EMB             | 27/39 (69%)  |
| p.Phe110Leu ( <i>ethR</i> )                              | ETH             | 2/2 (100%)   |
| p.Phe94Leu ( <i>pncA</i> )                               | PZA             | 1/1 (100%)   |
| p.Pro54Leu ( <i>pncA</i> )                               | PZA             | 1/1 (100%)   |
| p.Ser315Asn ( <i>katG</i> )                              | INH             | 0/2 (0%)     |
| p.Ser315Thr ( <i>katG</i> )                              | INH             | 19/111 (17%) |
| p.Ser315Thr ( <i>katG</i> ); p.Asp73His ( <i>ahpC</i> )  | INH             | 0/1 (0%)     |
| p.Ser441Gln ( <i>rpoB</i> )                              | RIF             | 0/1 (0%)     |
| p.Ser447Phe ( <i>gyrB</i> ); p.Asp94Gly ( <i>gyrA</i> )  | CIP LFX MFX OFX | 1/1 (100%)   |
| p.Ser450Leu ( <i>rpoB</i> )                              | RIF             | 2/79 (3%)    |
| p.Ser450Leu ( <i>rpoB</i> ); p.Leu527Val ( <i>rpoC</i> ) | RIF             | 0/2 (0%)     |
| p.Ser450Leu ( <i>rpoB</i> ); p.Phe452Ser ( <i>rpoC</i> ) | RIF             | 0/1 (0%)     |
| p.Ser450Trp ( <i>rpoB</i> )                              | RIF             | 0/1 (0%)     |
| p.Ser67Pro ( <i>pncA</i> )                               | PZA             | 1/1 (100%)   |
| p.Ser94Ala ( <i>inhA</i> )                               | ETH INH         | 2/2 (100%)   |
| p.Thr168Asn ( <i>pncA</i> )                              | PZA             | 1/1 (100%)   |
| p.Thr400Ala ( <i>rpoB</i> ); p.Ser450Leu ( <i>rpoB</i> ) | RIF             | 0/1 (0%)     |
| p.Thr76Pro ( <i>pncA</i> )                               | PZA             | 1/1 (100%)   |
| p.Tyr103* ( <i>pncA</i> )                                | PZA             | 1/1 (100%)   |
| p.Tyr319Ser ( <i>embB</i> )                              | EMB             | 5/5 (100%)   |
| p.Val139Ala ( <i>pncA</i> )                              | PZA             | 1/1 (100%)   |
| p.Val170Phe ( <i>rpoB</i> )                              | RIF             | 0/2 (0%)     |
| p.Val170Phe ( <i>rpoB</i> ); p.His445Tyr ( <i>rpoB</i> ) | RIF             | 0/1 (0%)     |
| p.Val1Ala ( <i>katG</i> )                                | INH             | 1/1 (100%)   |
| r.1401a>g ( <i>rrs</i> )                                 | AMK CAP KM      | 9/10 (90%)   |
| r.513c>t ( <i>rrs</i> )                                  | SM              | 1/1 (100%)   |
| r.514a>c ( <i>rrs</i> )                                  | SM              | 10/11 (91%)  |
| r.517c>t ( <i>rrs</i> )                                  | SM              | 2/2 (100%)   |
| r.905c>g ( <i>rrs</i> )                                  | SM              | 2/2 (100%)   |
| r.906a>g ( <i>rrs</i> )                                  | SM              | 1/3 (33%)    |
| r.907a>t ( <i>rrs</i> )                                  | SM              | 1/1 (100%)   |

40  
41  
42  
43  
44  
45  
46  
47  
48

Footnote: The mutation with the corresponding gene is according to the Human Genome Variation Society (HGVS) nomenclature. The c. stand for coding DNA reference sequence, p. for protein reference sequence, r. for RNA reference sequence, and the \* in the mutation stands for translation termination (stop) codon.

Abbreviations: SM, streptomycin; PAS, para-aminosalicylic-acid; INH, isoniazid; PZA, pyrazinamide; CS, cycloserine; KM, kanamycin; ETH, ethionamide; EMB, ethambutol; RIF, rifampicin; OFX, ofloxacin; CIP, ciprofloxacin; MFX moxifloxacin; LFX, levofloxacin, LZD, linezolid; BDQ, bedaquiline; CFZ, clofazimine; DLM, delamanid; CLR, clarithromycin; AMX, amoxicillin; CM, capreomycin; AM, Amikacin

49 **Supplementary Table 4. Classification of treatment regimens by drug resistance profile.**

50

| Drug resistance according to WGS | Total | Treatment compatible with WHO guidelines                                                                                                                                                                                                                                                                                                                                                  | Total | Under-treatment                                                                                                                            | Total | Over-treatment                                                                                                                                                  |
|----------------------------------|-------|-------------------------------------------------------------------------------------------------------------------------------------------------------------------------------------------------------------------------------------------------------------------------------------------------------------------------------------------------------------------------------------------|-------|--------------------------------------------------------------------------------------------------------------------------------------------|-------|-----------------------------------------------------------------------------------------------------------------------------------------------------------------|
| <b>Pan-susceptible</b>           | 320   | 320 INH PZA EMB RIF                                                                                                                                                                                                                                                                                                                                                                       | 0     |                                                                                                                                            | 19    | 1 INH PZA EMB OFX<br>2 INH PZA KM EMB MFX CFZ<br>1 PZA CS KM EMB LFX<br>4 PZA CS KM LFX<br>9 PZA KM ETH EMB MFX<br>1 SM INH PZA EMB OFX<br>1 SM INH PZA EMB RIF |
| <b>Monoresistance</b>            | 27    |                                                                                                                                                                                                                                                                                                                                                                                           | 8     |                                                                                                                                            | 0     |                                                                                                                                                                 |
| INH                              | 1     | 1 PZA CS KM LFX                                                                                                                                                                                                                                                                                                                                                                           | 7     | 7 INH PZA EMB RIF                                                                                                                          | 0     |                                                                                                                                                                 |
| PZA                              | 2     | 2 INH PZA EMB RIF                                                                                                                                                                                                                                                                                                                                                                         | 0     |                                                                                                                                            | 0     |                                                                                                                                                                 |
| EMB                              | 1     | 1 INH PZA EMB RIF                                                                                                                                                                                                                                                                                                                                                                         | 0     |                                                                                                                                            | 0     |                                                                                                                                                                 |
| RIF                              | 23    | 2 INH PZA KM EMB MFX CFZ<br>2 PZA CS AMK LFX<br>4 PZA CS KM LFX<br>14 PZA KM ETH EMB MFX<br>1 SM INH PZA EMB RIF                                                                                                                                                                                                                                                                          | 1     | 1 INH PZA EMB RIF                                                                                                                          | 0     |                                                                                                                                                                 |
| <b>MDR</b>                       | 110   | 51 INH PZA KM EMB MFX CFZ<br>2 PAS INH PZA KM ETH EMB MFX LZD BDQ CFZ DLM<br>2 PAS PZA CS KM ETH EMB<br>1 PAS PZA CS KM ETH LFX<br>1 PAS PZA KM ETH EMB LFX<br>1 PAS PZA KM ETH MFX LZD CFZ<br>3 PZA CS AMK LFX<br>1 PZA CS ETH EMB AMK LFX<br>3 PZA CS KM EMB LFX<br>1 PZA CS KM ETH EMB<br>7 PZA CS KM ETH EMB LFX<br>21 PZA CS KM LFX<br>14 PZA KM ETH EMB MFX<br>2 SM INH PZA EMB RIF | 30    | 1 CS KM ETH EMB LFX<br>15 INH PZA EMB RIF<br>1 INH PZA KM EMB LFX<br>1 PZA CS KM ETH EMB LFX<br>1 PZA EMB RIF LFX<br>11 PZA KM ETH EMB MFX | 0     |                                                                                                                                                                 |
| <b>Pre-XDR/XDR</b>               | 12    | 3 INH PZA KM EMB MFX CFZ<br>2 PAS INH PZA KM ETH EMB MFX LZD BDQ CFZ DLM<br>1 PAS PZA CS KM ETH EMB<br>2 PAS PZA KM ETH MFX LFX LZD BDQ<br>3 PAS PZA KM ETH MFX LZD CFZ<br>1 PZA CS KM LFX                                                                                                                                                                                                | 12    | 1 INH PZA EMB RIF<br>7 INH PZA KM EMB MFX CFZ<br>1 PZA CS KM EMB OFX<br>3 PZA CS KM LFX                                                    | 0     |                                                                                                                                                                 |
| <b>Other:</b>                    | 21    |                                                                                                                                                                                                                                                                                                                                                                                           | 17    |                                                                                                                                            | 0     |                                                                                                                                                                 |
| 5 ETH                            |       | 5 INH PZA EMB RIF                                                                                                                                                                                                                                                                                                                                                                         |       |                                                                                                                                            |       |                                                                                                                                                                 |
| 1 CS                             |       | 1 INH PZA EMB RIF                                                                                                                                                                                                                                                                                                                                                                         |       |                                                                                                                                            |       |                                                                                                                                                                 |
| 9 SM                             |       | 9 INH PZA EMB RIF                                                                                                                                                                                                                                                                                                                                                                         |       |                                                                                                                                            |       |                                                                                                                                                                 |
| 1 EMB SM                         |       | 1 INH PZA EMB RIF                                                                                                                                                                                                                                                                                                                                                                         |       |                                                                                                                                            |       |                                                                                                                                                                 |

---

|                              |                      |                    |
|------------------------------|----------------------|--------------------|
| 1 EMB RIF LFX MFX OFX CIP SM | 1 PZA CS KM LFX      |                    |
| 1 RIF PZA ETH SM             | 1 PZA KM ETH EMB MFX |                    |
| 1 INH PZA                    | 1 PZA KM ETH EMB MFX |                    |
| 1 EMB INH SM                 | 1 PZA KM ETH EMB MFX |                    |
| 1 EMB RIF                    | 1 PZA CS AMK LFX     |                    |
| 14 INH ETH                   |                      | 14 INH PZA EMB RIF |
| 1 INH LFX MFX OFX PAS CIP    |                      | 1 INH PZA EMB RIF  |
| 1 INH SM                     |                      | 1 INH PZA EMB RIF  |
| 1 INH ETH SM                 |                      | 1 INH PZA EMB RIF  |

---

51

52 Abbreviations: vs, versus; WGS, whole-genome sequencing; WHO, World Health Organization; MDR, multidrug resistance; Pre-XDR/XDR, pre-/ extensively drug resistance; SM, streptomycin; PAS, para-  
53 aminosalicylic-acid; INH, isoniazid; PZA, pyrazinamide; CS, cycloserine; KM, kanamycin; ETH, ethionamide; EMB, ethambutol; RIF, rifampicin; OFX, ofloxacin; CIP, ciprofloxacin; MFX moxifloxacin; LFX,  
54 levofloxacin, LZD, linezolid; BDQ, bedaquiline; CFZ, clofazimine; DLM, delamanid.

**Supplementary Table 5. Results from univariable logistic regression model on the probability of death during tuberculosis treatment.**

| Category                       | Number of patients<br>(n=530) | Number of deaths<br>(n=63) | OR (95% CI)      |
|--------------------------------|-------------------------------|----------------------------|------------------|
| <b>Gender</b>                  |                               |                            |                  |
| Men                            | 323                           | 44                         | 1.56 (0.9-2.81)  |
| Women                          | 207                           | 19                         | 1                |
| <b>Age</b>                     |                               |                            |                  |
| <i>At diagnosis [IQR]</i>      | 34 (27-43)                    | 37 (30-47)                 | 1.03 (1-1.05)    |
| <b>HIV status</b>              |                               |                            |                  |
| HIV-positive                   | 218                           | 24                         | 1.15 (0.68-2.01) |
| HIV-negative                   | 312                           | 39                         | 1                |
| <b>History of tuberculosis</b> |                               |                            |                  |
| Yes                            | 200                           | 29                         | 1.48 (0.86-2.51) |
| No                             | 330                           | 34                         | 1                |
| <b>Sputum</b>                  |                               |                            |                  |
| Positive                       | 427                           | 53                         | 0.76 (0.35-1.49) |
| Negative                       | 103                           | 10                         | 1                |

Abbreviations: IQR, interquartile range; OR, odds ratio; CI: Confidence Interval.

**Supplementary Table 6. Available and routinely performed drug resistance testing during the study period and in 2020. Newer drugs are indicated in bold.**

| Country             | Study period                         |                                                            | 2020                                                  |                                                                                                          |
|---------------------|--------------------------------------|------------------------------------------------------------|-------------------------------------------------------|----------------------------------------------------------------------------------------------------------|
|                     | DST tests reported as available      | Drug resistances that were tested among study participants | DST tests reported as available                       | Drug resistances which are routinely tested                                                              |
| <b>Ivory Coast</b>  | Culture                              | INH, RIF                                                   | Xpert, LPA (HAIN MTBDRplus), Culture                  | INH, RIF, EMB, PZA, SM                                                                                   |
| <b>DRC</b>          | Xpert, Culture                       | INH, RIF, PZA, EMB, SM, AMK, MFX                           | Xpert, Culture                                        | RIF, INH, EMB, PZA, SM, MFX, OFX, LFX                                                                    |
| <b>Kenya</b>        | Xpert                                | INH, RIF                                                   | Xpert, LPA (HAIN MTBDRsl), Culture                    | RIF                                                                                                      |
| <b>Nigeria</b>      | Xpert, LPA (HAIN MTBDRplus), Culture | INH, RIF                                                   | Xpert, LPA (HAIN MTBDRplus and HAIN MTBDRsl), Culture | INH, RIF, AMK, KM, MFX, OFX, LFX, ETH, PAS, CS, CM, CS, VIOMYCIN                                         |
| <b>South Africa</b> | Xpert, LPA (HAIN MTBDRplus), Culture | INH, RIF, INJ, FQ                                          | Xpert, LPA (HAIN MTBDRplus and HAIN MTBDRsl), Culture | RIF, INH, FQ                                                                                             |
| <b>Peru</b>         | Culture                              | INH, RIF                                                   | Xpert, LPA (HAIN MTBDRplus), Culture                  | RIF, INH, EMB                                                                                            |
| <b>Thailand</b>     | Culture                              | INH, RIF, SM                                               | Xpert, LPA (HAIN MTBDRplus and HAIN MTBDRsl), Culture | INH, RIF, EMB, SM, AMK, MFX, OFX, LFX, ETH, PAS, CS, CFZ, AMX, CIP, CLR, IPM, KAN, <b>LZD</b> , MPM, PTO |

Abbreviations: SM, streptomycin; PAS, para-aminosalicylic-acid; INH, isoniazid; PZA, pyrazinamide; CS, cycloserine; KM, kanamycin; ETH, ethionamide; EMB, ethambutol; RIF, rifampicin; OFX, ofloxacin; CIP, ciprofloxacin; MFX moxifloxacin; LFX, levofloxacin, LZD, linezolid; BDQ, bedaquiline; CFZ, clofazimine; DLM, delamanid; CLR, clarithromycin; AMX, amoxicillin; CM, capreomycin; IPM, imipenem; AMK, amikacin; MPM, meropenem.

**Supplementary Table 7. Sequence reference number and accession number for the 582 *Mycobacterium tuberculosis* strains analysed.**

| <b>Genome IDF</b> | <b>Accession Nr</b> |
|-------------------|---------------------|
| G03157            | SAMN04276734        |
| G03158            | SAMN04276698        |
| G03159            | SAMN04276741        |
| G03161            | SAMN04276714        |
| G03162            | SAMN04276692        |
| G03163            | SAMN04276696        |
| G03164            | SAMN04276702        |
| G03165            | SAMN04276691        |
| G03167            | SAMN04276652        |
| G03168            | SAMN04276744        |
| G03169            | SAMN04276653        |
| G03170            | SAMN04276700        |
| G03171            | SAMN04276654        |
| G03172            | SAMN04276701        |
| G03173            | SAMN04276735        |
| G03174            | SAMN04276699        |
| G03176            | SAMN04276727        |
| G03177            | SAMN04276720        |
| G03179            | SAMN04276703        |
| G03182            | SAMN04276715        |
| G03183            | SAMN04276655        |
| G03187            | SAMN04276740        |
| G03189            | SAMN04276688        |
| G03191            | SAMN04276706        |
| G03192            | SAMN04276656        |
| G03194            | SAMN04276708        |
| G03195            | SAMN04276710        |
| G03196            | SAMN04276657        |
| G03198            | SAMN04276709        |
| G03199            | SAMN04276658        |
| G03200            | SAMN04276704        |
| G03202            | SAMN04276689        |
| G03203            | SAMN04276717        |
| G03204            | SAMN04276659        |
| G03205            | SAMN04276693        |
| G03206            | SAMN04276660        |
| G03207            | SAMN04276737        |
| G03208            | SAMN04276694        |
| G03209            | SAMN04276729        |
| G03210            | SAMN04276745        |
| G03211            | SAMN04276712        |
| G03213            | SAMN04276661        |
| G03214            | SAMN04276732        |
| G03215            | SAMN04276662        |
| G03216            | SAMN04276731        |
| G03217            | SAMN04276663        |
| G03218            | SAMN04276664        |
| G03219            | SAMN04276726        |
| G03220            | SAMN04276713        |
| G03221            | SAMN04276725        |
| G03222            | SAMN04276665        |
| G03223            | SAMN04276666        |
| G03225            | SAMN04276707        |
| G03226            | SAMN04276668        |
| G03227            | SAMN04276669        |
| G03228            | SAMN04276670        |
| G03229            | SAMN04276733        |
| G03230            | SAMN04276671        |
| G03231            | SAMN04276728        |
| G03232            | SAMN04276730        |
| G03233            | SAMN04276718        |
| G03234            | SAMN04276722        |
| G03235            | SAMN04276743        |
| G03236            | SAMN04276687        |
| G03237            | SAMN04276721        |
| G04030            | SAMN04276755        |
| G04031            | SAMN04276807        |
| G04032            | SAMN04276787        |
| G04033            | SAMN04276754        |



---

|        |              |
|--------|--------------|
| G04034 | SAMN04276767 |
| G04035 | SAMN04276773 |
| G04037 | SAMN04276818 |
| G04038 | SAMN04276792 |
| G04039 | SAMN04276800 |
| G04040 | SAMN04276779 |
| G04041 | SAMN04276748 |
| G04042 | SAMN04276830 |
| G04043 | SAMN04276822 |
| G04046 | SAMN04276825 |
| G04047 | SAMN04276823 |
| G04048 | SAMN04276836 |
| G04049 | SAMN04276797 |
| G04050 | SAMN04276798 |
| G04051 | SAMN04276806 |
| G04052 | SAMN04276811 |
| G04053 | SAMN04276815 |
| G04054 | SAMN04276771 |
| G04055 | SAMN04276824 |
| G04056 | SAMN04276808 |
| G04057 | SAMN04276757 |
| G04059 | SAMN04276821 |
| G04060 | SAMN04276834 |
| G04061 | SAMN04276799 |
| G04062 | SAMN04276776 |
| G04063 | SAMN04276831 |
| G04064 | SAMN04276796 |
| G04065 | SAMN04276829 |
| G04066 | SAMN04276753 |
| G04067 | SAMN04276750 |
| G04068 | SAMN04276751 |
| G04069 | SAMN04276802 |
| G04070 | SAMN04276820 |
| G04071 | SAMN04276804 |
| G04072 | SAMN04276810 |
| G04073 | SAMN06251200 |
| G04074 | SAMN04276749 |
| G04075 | SAMN04276752 |
| G04076 | SAMN04276782 |
| G04077 | SAMN04276778 |
| G04078 | SAMN04276770 |
| G04079 | SAMN04276780 |
| G04081 | SAMN04276769 |
| G04082 | SAMN04276763 |
| G04084 | SAMN04276794 |
| G04086 | SAMN04276765 |
| G04087 | SAMN04276777 |
| G04088 | SAMN04276764 |
| G04089 | SAMN04276774 |
| G04090 | SAMN04276772 |
| G04092 | SAMN04276775 |
| G04093 | SAMN04276801 |
| G04094 | SAMN04276813 |
| G04095 | SAMN04276762 |
| G04096 | SAMN04276786 |
| G04097 | SAMN04276809 |
| G04098 | SAMN04276758 |
| G04100 | SAMN04276814 |
| G04102 | SAMN04276766 |
| G04104 | SAMN04276841 |
| G04105 | SAMN04276833 |
| G04106 | SAMN04276835 |
| G04107 | SAMN04276840 |
| G04108 | SAMN04276812 |
| G04109 | SAMN04276826 |
| G04110 | SAMN04276837 |
| G04111 | SAMN04276790 |
| G04113 | SAMN04276832 |
| G04114 | SAMN04276756 |
| G04115 | SAMN04276817 |
| G04116 | SAMN04276768 |
| G04117 | SAMN04276784 |
| G04120 | SAMN04276793 |
| G04122 | SAMN04276839 |
| G04123 | SAMN04276828 |

---

---

|        |              |
|--------|--------------|
| G04124 | SAMN04276819 |
| G04169 | SAMN04276805 |
| G04316 | SAMN04276679 |
| G04317 | SAMN04276680 |
| G04318 | SAMN04276681 |
| G04319 | SAMN04276682 |
| G04320 | SAMN06251197 |
| G04322 | SAMN04276683 |
| G05010 | SAMN04521938 |
| G05011 | SAMN04522015 |
| G05012 | SAMN04522025 |
| G05013 | SAMN04522026 |
| G05014 | SAMN04522017 |
| G05015 | SAMN04522021 |
| G05017 | SAMN04522023 |
| G05018 | SAMN04522031 |
| G05020 | SAMN04522029 |
| G05021 | SAMN04522028 |
| G05022 | SAMN04522033 |
| G05024 | SAMN04522013 |
| G05025 | SAMN04521995 |
| G05026 | SAMN04521996 |
| G05028 | SAMN04521998 |
| G05032 | SAMN04522002 |
| G05034 | SAMN04522004 |
| G05035 | SAMN04522005 |
| G05036 | SAMN04522006 |
| G05037 | SAMN04522007 |
| G05038 | SAMN04522008 |
| G05039 | SAMN04522024 |
| G05041 | SAMN04522022 |
| G05043 | SAMN04522011 |
| G05044 | SAMN04522016 |
| G05045 | SAMN04522027 |
| G05046 | SAMN04521939 |
| G05047 | SAMN04521940 |
| G05048 | SAMN04521941 |
| G05051 | SAMN04521944 |
| G05052 | SAMN04521945 |
| G05053 | SAMN04521946 |
| G05054 | SAMN04521947 |
| G05056 | SAMN04521949 |
| G05058 | SAMN04521951 |
| G05059 | SAMN04521952 |
| G05060 | SAMN04521953 |
| G05061 | SAMN04521954 |
| G05063 | SAMN04521956 |
| G05064 | SAMN04521957 |
| G05065 | SAMN04521958 |
| G05066 | SAMN04521959 |
| G05067 | SAMN04521960 |
| G05068 | SAMN04521961 |
| G05069 | SAMN04521962 |
| G05070 | SAMN04521963 |
| G05071 | SAMN04521964 |
| G05072 | SAMN04521965 |
| G05074 | SAMN04521967 |
| G05075 | SAMN04521968 |
| G05076 | SAMN04521969 |
| G05077 | SAMN04521970 |
| G05078 | SAMN04521971 |
| G05079 | SAMN04521972 |
| G05080 | SAMN04521973 |
| G05081 | SAMN04521974 |
| G05082 | SAMN04521975 |
| G05083 | SAMN04521976 |
| G05084 | SAMN04521977 |
| G05085 | SAMN04521978 |
| G05086 | SAMN04521979 |
| G05087 | SAMN04521980 |
| G05088 | SAMN04521981 |
| G05089 | SAMN04521982 |
| G05090 | SAMN04521983 |
| G05091 | SAMN04521984 |
| G05092 | SAMN04521985 |

---

---

|        |              |
|--------|--------------|
| G05093 | SAMN04521986 |
| G05094 | SAMN04521987 |
| G05095 | SAMN04522009 |
| G05096 | SAMN04521988 |
| G05097 | SAMN04521989 |
| G05098 | SAMN04521990 |
| G05099 | SAMN04521991 |
| G05100 | SAMN04521992 |
| G05101 | SAMN04521993 |
| G05102 | SAMN04521994 |
| G05103 | SAMN04522010 |
| G05106 | SAMN04522071 |
| G05109 | SAMN04522036 |
| G05110 | SAMN04522038 |
| G05112 | SAMN04522041 |
| G05114 | SAMN04522048 |
| G05122 | SAMN04522052 |
| G05123 | SAMN04522053 |
| G05125 | SAMN06251204 |
| G05127 | SAMN04522057 |
| G05132 | SAMN04522061 |
| G05137 | SAMN04522069 |
| G05138 | SAMN04522068 |
| G05140 | SAMN04522075 |
| G05144 | SAMN04522078 |
| G05146 | SAMN06251205 |
| G05149 | SAMN06251206 |
| G05150 | SAMN04522098 |
| G05152 | SAMN04522081 |
| G05156 | SAMN04522085 |
| G05158 | SAMN04522035 |
| G05160 | SAMN04522093 |
| G05162 | SAMN04522095 |
| G05163 | SAMN04522125 |
| G05164 | SAMN04522126 |
| G05165 | SAMN04522097 |
| G05168 | SAMN04522100 |
| G05169 | SAMN04522114 |
| G05171 | SAMN04522101 |
| G05172 | SAMN04522102 |
| G05173 | SAMN04522103 |
| G05174 | SAMN04522104 |
| G05175 | SAMN04522107 |
| G05177 | SAMN04522108 |
| G05178 | SAMN04522106 |
| G05179 | SAMN04522111 |
| G05180 | SAMN04522109 |
| G05181 | SAMN04522112 |
| G05182 | SAMN04522110 |
| G05184 | SRR7517725   |
| G05187 | SAMN04522118 |
| G05189 | SAMN04522120 |
| G05190 | SAMN04522121 |
| G05194 | SAMN04522051 |
| G05196 | SAMN04522087 |
| G05198 | SAMN04522089 |
| G05199 | SAMN04522090 |
| G05203 | SAMN04522128 |
| G05204 | SAMN04522129 |
| G05207 | SAMN04522127 |
| G05209 | SAMN04522049 |
| G07408 | SRR7517680   |
| G07409 | SAMN06251226 |
| G07410 | SAMN06251221 |
| G07411 | SAMN06251255 |
| G07412 | SAMN06251250 |
| G07413 | SAMN06251253 |
| G07414 | SAMN06251256 |
| G07415 | SAMN06251203 |
| G07416 | SAMN06251243 |
| G07417 | SAMN06251225 |
| G07418 | SRR7517681   |
| G07422 | SAMN06251222 |
| G07424 | SAMN06251228 |
| G07425 | SAMN06251223 |

---

---

|        |              |
|--------|--------------|
| G07426 | SAMN06251224 |
| G07427 | SAMN06251207 |
| G07428 | SAMN06251246 |
| G07430 | SAMN06251247 |
| G07432 | SAMN06251230 |
| G07435 | SAMN06251234 |
| G07438 | SAMN06251242 |
| G07440 | SAMN06251244 |
| G07442 | SAMN06251227 |
| G07443 | SAMN06251252 |
| G07444 | SRR7517678   |
| G07446 | SRR7517679   |
| G07447 | SRR7517684   |
| G07448 | SRR7517685   |
| G07450 | SRR7517683   |
| G07452 | SRR7517687   |
| G07453 | SRR7517780   |
| G07454 | SRR7517779   |
| G07455 | SAMN06251251 |
| G07456 | SAMN06251254 |
| G07457 | SAMN06251235 |
| G07459 | SAMN06251245 |
| G07460 | SAMN06251249 |
| G07461 | SAMN06251202 |
| G07462 | SAMN06251208 |
| G07463 | SAMN06251209 |
| G07464 | SAMN06251210 |
| G07465 | SAMN06251211 |
| G07466 | SAMN06251212 |
| G07467 | SAMN06251213 |
| G07468 | SAMN06251214 |
| G07469 | SAMN06251215 |
| G07470 | SAMN06251219 |
| G07471 | SAMN06251220 |
| G07472 | SAMN06251216 |
| G07473 | SAMN06251217 |
| G07474 | SAMN06251218 |
| G07479 | SAMN06251201 |
| G07480 | SRR7517778   |
| G07482 | SRR7517777   |
| G07486 | SRR7517784   |
| G07487 | SAMN06251198 |
| G07488 | SRR7517783   |
| G07490 | SAMN06251199 |
| G07491 | SAMN06251240 |
| G07492 | SAMN06251248 |
| G07493 | SAMN06251237 |
| G08154 | SRR7517781   |
| G08155 | SRR7517776   |
| G08156 | SRR7517775   |
| G08370 | SAMN06251193 |
| G08371 | SAMN06251194 |
| G08372 | SAMN06251195 |
| G08373 | SAMN06251196 |
| G08747 | SRR7517801   |
| G08799 | SRR7517834   |
| G08800 | SRR7517831   |
| G08801 | SRR7517832   |
| G08802 | SRR7517829   |
| G08804 | SRR7517827   |
| G08805 | SRR7517828   |
| G08806 | SRR7517835   |
| G08807 | SRR7517836   |
| G08808 | SRR7517812   |
| G08809 | SRR7517811   |
| G08810 | SRR7517810   |
| G08811 | SRR7517809   |
| G08812 | SRR7517816   |
| G08813 | SRR7517815   |
| G08814 | SRR7517814   |
| G08815 | SRR7517813   |
| G08818 | SRR7517792   |
| G08819 | SRR7517793   |
| G08820 | SRR7517794   |
| G08821 | SRR7517795   |

---

---

|        |              |
|--------|--------------|
| G08822 | SRR7517788   |
| G08823 | SRR7517789   |
| G08824 | SRR7517790   |
| G08825 | SRR7517791   |
| G08827 | SRR7517787   |
| G08828 | SRR7517768   |
| G08829 | SRR7517767   |
| G08830 | SRR7517770   |
| G08831 | SRR7517769   |
| G08832 | SRR7517772   |
| G08834 | SRR7517774   |
| G08835 | SRR7517773   |
| G08836 | SRR7517760   |
| G19889 | SAMEA6797830 |
| G19890 | SAMEA6797831 |
| G19891 | SAMEA6797832 |
| G19892 | SAMEA6797833 |
| G19894 | SAMEA6797806 |
| G19895 | SAMEA6797834 |
| G19896 | SAMEA6797835 |
| G19897 | SAMEA6797836 |
| G19900 | SAMEA6797823 |
| G19904 | SAMEA6797816 |
| G19905 | SAMEA6797837 |
| G19906 | SAMEA6797838 |
| G19912 | SAMEA6797840 |
| G19913 | SAMEA6797811 |
| G19914 | SAMEA6797798 |
| G19915 | SAMEA6797841 |
| G19916 | SAMEA6797819 |
| G19917 | SAMEA6797842 |
| G19918 | SAMEA6797843 |
| G19920 | SAMEA6797820 |
| G19922 | SAMEA6797844 |
| G19923 | SAMEA6797804 |
| G19924 | SAMEA6797817 |
| G19925 | SAMEA6797845 |
| G19926 | SAMEA6797801 |
| G19927 | SAMEA6797846 |
| G19928 | SAMEA6797807 |
| G19929 | SAMEA6797825 |
| G19930 | SAMEA6797815 |
| G19931 | SAMEA6797847 |
| G19932 | SAMEA6797848 |
| G19933 | SAMEA6797849 |
| G19934 | SAMEA6797850 |
| G19936 | SAMEA6797851 |
| G19938 | SAMEA6797824 |
| G19939 | SAMEA6797852 |
| G19940 | SAMEA6797853 |
| G19943 | SAMEA6797821 |
| G19952 | SAMEA6797813 |
| G19954 | SAMEA6797814 |
| G19955 | SAMEA6797854 |
| G19956 | SAMEA6797855 |
| G19957 | SAMEA6797856 |
| G19958 | SAMEA6797857 |
| G19959 | SAMEA6797858 |
| G19961 | SAMEA6797859 |
| G19962 | SAMEA6797860 |
| G19963 | SAMEA6797861 |
| G19964 | SAMEA6797862 |
| G19968 | SAMEA6797863 |
| G19973 | SAMEA6797864 |
| G19974 | SAMEA6797865 |
| G19975 | SAMEA6797826 |
| G19980 | SAMEA6797827 |
| G19981 | SAMEA6797866 |
| G19982 | SAMEA6797867 |
| G19983 | SAMEA6797868 |
| G19984 | SAMEA6797805 |
| G19985 | SAMEA6797869 |
| G19986 | SAMEA6797870 |
| G19987 | SAMEA6797871 |
| G19988 | SAMEA6797872 |

---

---

|        |              |
|--------|--------------|
| G19989 | SAMEA6797873 |
| G19990 | SAMEA6797874 |
| G19991 | SAMEA6797794 |
| G19992 | SAMEA6797875 |
| G19993 | SAMEA6797876 |
| G19994 | SAMEA6797877 |
| G19995 | SAMEA6797796 |
| G19996 | SAMEA6797878 |
| G19997 | SAMEA6797879 |
| G19998 | SAMEA6797799 |
| G19999 | SAMEA6797795 |
| G20001 | SAMEA6797880 |
| G20005 | SAMEA6797881 |
| G20007 | SAMEA6797882 |
| G20009 | SAMEA6797884 |
| G20012 | SAMEA6797885 |
| G20014 | SAMEA6797886 |
| G20017 | SAMEA6797887 |
| G20019 | SAMEA6797888 |
| G20021 | SAMEA6797889 |
| G20022 | SAMEA6797890 |
| G20023 | SAMEA6797891 |
| G20034 | SAMEA6797892 |
| G20048 | SAMEA6797893 |
| G20050 | SAMEA6797894 |
| G20082 | SAMEA6797904 |
| G20084 | SAMEA6797906 |
| G20085 | SAMEA6797907 |
| G20086 | SAMEA6797810 |
| G20087 | SAMEA6797908 |
| G20089 | SAMEA6797909 |
| G20091 | SAMEA6797808 |
| G20099 | SAMEA6797913 |
| G20100 | SAMEA6797914 |
| G21714 | SAMN14123454 |
| G21720 | SAMN14123457 |
| G21726 | SAMEA6797921 |
| G21727 | SRR11098560  |
| G21733 | SAMEA6797922 |
| G21738 | SAMN1412345  |
| G21741 | SAMN14123455 |
| G21876 | SAMEA6797928 |
| G21877 | SAMEA6797929 |
| G21881 | SAMEA6797931 |
| G21887 | SAMEA6797802 |
| G21889 | SAMEA6797933 |
| G21891 | SAMEA6797935 |
| G21895 | SAMEA6797936 |
| G21914 | SAMEA6797800 |
| G21922 | SAMEA6797822 |
| G21932 | SAMEA6797948 |
| G21939 | SAMEA6797952 |
| G21940 | SAMEA6797953 |
| G21941 | SAMEA6797954 |
| G21950 | SAMEA6797812 |
| G21968 | SAMEA6797803 |
| G21969 | SAMEA6797964 |
| G21975 | SAMEA6797809 |
| G22164 | SAMEA6797967 |
| G22167 | SAMEA6797968 |
| G22172 | SAMEA6797970 |
| G22174 | SAMEA6797971 |
| G22177 | SAMEA6797973 |
| G22178 | SAMEA6797974 |
| G22181 | SAMEA6797976 |
| G22188 | SAMEA6797978 |
| G22192 | SAMEA6797797 |
| G22193 | SAMEA6797980 |
| G22196 | SAMEA6797981 |
| G22203 | SAMEA6797982 |
| G08795 | SAMN15098172 |
| G08796 | SAMN15098173 |
| G08798 | SAMN15098174 |
| G19893 | SAMN15098175 |
| G19899 | SAMN15098176 |

---

---

|        |              |
|--------|--------------|
| G19901 | SAMN15098177 |
| G19902 | SAMN15098178 |
| G19903 | SAMN15098179 |
| G19908 | SAMN15098180 |
| G19909 | SAMN15098181 |
| G19911 | SAMN15098182 |
| G19919 | SAMN15098183 |
| G19935 | SAMN15098184 |
| G19937 | SAMN15098185 |
| G19941 | SAMN15098186 |
| G19945 | SAMN15098187 |
| G19946 | SAMN15098188 |
| G19950 | SAMN15098189 |
| G19953 | SAMN15098190 |
| G19960 | SAMN15098191 |
| G19965 | SAMN15098192 |
| G19967 | SAMN15098193 |
| G19970 | SAMN15098194 |
| G19971 | SAMN15098195 |
| G19972 | SAMN15098196 |
| G20029 | SAMN15098197 |
| G20035 | SAMN15098198 |
| G20036 | SAMN15098199 |
| G20037 | SAMN15098200 |
| G20038 | SAMN15098201 |
| G20054 | SAMN15098202 |
| G20056 | SAMN15098203 |
| G20058 | SAMN15098204 |
| G20062 | SAMN15098205 |
| G20063 | SAMN15098206 |
| G20064 | SAMN15098207 |
| G20065 | SAMN15098208 |
| G20066 | SAMN15098209 |
| G20067 | SAMN15098210 |
| G20068 | SAMN15098211 |
| G20069 | SAMN15098212 |
| G20088 | SAMN15098213 |
| G20090 | SAMN15098214 |
| G20092 | SAMN15098215 |
| G20093 | SAMN15098216 |
| G21716 | SAMN15098217 |
| G21717 | SAMN15098218 |
| G21719 | SAMN15098219 |
| G21721 | SAMN15098220 |
| G21723 | SAMN15098221 |
| G21724 | SAMN15098222 |
| G21729 | SAMN15098223 |
| G21731 | SAMN15098224 |
| G21732 | SAMN15098225 |
| G21743 | SAMN15098226 |
| G21744 | SAMN15098227 |
| G21905 | SAMN15098228 |
| G21919 | SAMN15098229 |
| G22156 | SAMN15098230 |
| G22157 | SAMN15098231 |
| G22159 | SAMN15098232 |
| G22189 | SAMN15098233 |
| G22190 | SAMN15098234 |
| G22194 | SAMN15098235 |
| G22197 | SAMN15098236 |
| G22198 | SAMN15098237 |
| G22200 | SAMN15098238 |
| G22201 | SAMN15098239 |

---

**Supplementary Table 8. List of collaborators**

| <b>First Name</b> | <b>Surname</b> |
|-------------------|----------------|
| Alash'le          | Abimiku        |
| Anchalee          | Avihingsanon   |
| Marie             | Ballif         |
| Guido             | Bloemberg      |
| Erik C.           | Boettger       |
| Sonia             | Borrell        |
| E. Jane           | Carter         |
| Jimena            | Collantes      |
| Helen             | Cox            |
| Lameck            | Diero          |
| Matthias          | Egger          |
| Nicholas          | Ezati          |
| Lukas             | Fenner         |
| Sebastien         | Gagneux        |
| Joachim           | Gnokoro        |
| Eduardo           | Gotuzzo        |
| Rico              | Hömke          |
| Robin             | Huebner        |
| Feldmann          | Julia          |
| Naruporn          | Kasipong       |
| Kamon             | Kawkitinarong  |
| Peter             | Keller         |
| Olivier           | Marcy          |
| Eugène            | Messou         |
| Kouassi           | N'Guessan      |
| Tor               | Petersen       |
| Martina           | Reichmuth      |
| Miriam            | Reinhard       |
| Neesha            | Rockwood       |
| Annette           | Sohn           |
| Elizabeth         | Streicher      |
| Martine           | Tabala         |
| Robin             | Warren         |
| Landry            | Wenzi          |
| Robert J.         | Wilkinson      |
| Marcel            | Yotebieng      |
| Carlos            | Zamudio        |
| Kathrin           | Zürcher        |
